# Supplementary material for: A simple one-pot fabrication of silver loaded semi-interpenetrating polymer network (IPN) hydrogels with self-healing and bactericidal abilities
Source: Royal Society of Chemistry journal article supplement (doi:10.1039/c9ra07906h), 2019-01-01
Supplement: c9ra07906h1.pdf [file c9ra07906h1.pdf]

*Supporting Information for*

**A Simple One-Pot Fabrication of Silver Loaded Semi-  
Interpenetrating Polymer Network (IPN) Hydrogels with Self-  
Healing and Bactericidal Abilities**

Mimpin Ginting,<sup>\*a</sup> Indra Masmur,<sup>a</sup> Subur P. Pasaribu<sup>b</sup> and Hestina<sup>c</sup>

<sup>a</sup>Department of Chemistry, Faculty of Mathematics and Natural Sciences, Universitas Sumatera Utara, Medan-20155, Indonesia.

<sup>b</sup>Department of Chemistry, Faculty of Mathematics and Natural Sciences, Mulawarman University, Samarinda-75123, Indonesia.

<sup>c</sup>Department of Chemistry, Universitas Sari Mutiara Indonesia, Medan-20123, Indonesia.

\*Corresponding Author: Mimpin Ginting, Department of Chemistry, Faculty of Mathematics and Natural Sciences, Universitas Sumatera Utara, Medan-20155, Indonesia.

e-mail: [mimpin.ginting@yahoo.com](mailto:mimpin.ginting@yahoo.com)

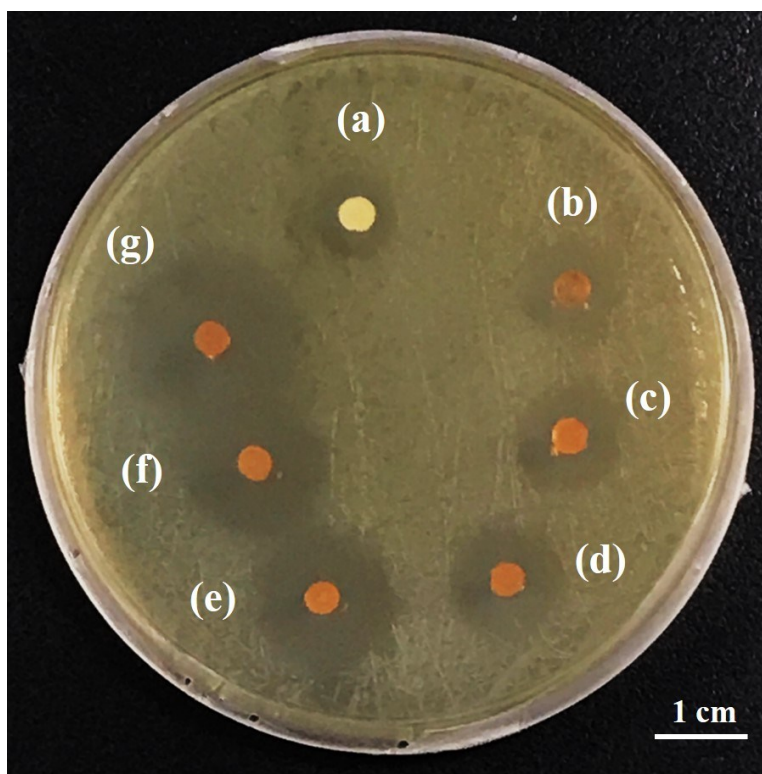

**Fig. 1S.** Antibacterial tests toward *Escherichia coli* with the samples of (a)  $\text{H}_2\text{O}_2$ ;  $\text{FeCl}_3$  with concentrations of (b) 0.25; (c) 0.5; (d) 0.75; (e) 1; (f) 1.25; and (g) 1.5 mol% of AA incubated for 12 h at  $37^\circ\text{C}$

**Table 1S.** The average zone of inhibition of hydrogels with variation concentration of  $\text{FeCl}_3$  toward *Escherichia coli*

| $\text{FeCl}_3$ concentration<br>(mol% of AA) | Zone of inhibition<br>(mm) |
|-----------------------------------------------|----------------------------|
| 0.25                                          | 8.14                       |
| 0.5                                           | 8.81                       |
| 0.75                                          | 10.27                      |
| 1                                             | 12.68                      |
| 1.25                                          | 13.87                      |
| 1.5                                           | 17.73                      |
